# Supplementary material for: Rates of morphological evolution in Captorhinidae: an adaptive radiation of Permian herbivores
Source: PeerJ. 2017 Apr 13;5:e3200. doi: 10.7717/peerj.3200 (PMC5392250; doi:10.7717/peerj.3200)
Supplement: Data S2 [file peerj-05-3200-s002.csv]

	Diet (1=Carnivore; 2=Omnivore; 3=Herbivore)	Max First	Min First	Max Last	Min Last
Moradisaurus	3	254.14	252.17	254.14	252.17
Gansurhinus	3	268.8	265.1	254.14	252.17
Rothianiscus	3	272.3	270.55	272.3	268.8
Labidosaurikos	3	277.9	272.3	277.9	272.3
Labidosaurus	2	283.5	272.3	277.9	272.3
Captorhinus_magnus	2	289	289	289	289
Captorhinus_aguti	2	289	289	277.9	272.3
Saurorictus	1	259.8	254.14	259.8	254.14
Protocaptorhinus	1	283.5	277.9	283.5	272.3
Romeria_texana	1	292.55	286.8	290.1	286.8
Romeria_prima	1	292.55	286.8	292.55	286.8
Rhiodenticulatus	1	296.95	292.55	296.95	292.55
Concordia	1	303.7	298.9	303.7	298.9
Captorhinus_laticeps	2	283.5	277.9	283.5	272.3
Captorhinikos_chozensis	3	277.9	272.3	277.9	272.3
Captorhinikos_valensis	3	277.9	289	277.9	272.3
Reiszorhinus	1	283.5	272.3	283.5	272.3
Thuringothyris	1	290.1	283.5	290.1	283.5
Opisthodontosaurus	1	289	289	289	289
MBCN_15730	3	259.1	252.17	259.1	252.17
Protorothyris	1	298.9	295	298.9	295
Paleothyris	1	311.1	307	311.1	307
Hylonomus	1	314.5	313.4	314.5	313.4
Archaeothyris	1	311.1	307	311.1	307
Westlothiana	1	334.9	330.9	334.9	330.9
