# Supplementary material for: Rates of morphological evolution in Captorhinidae: an adaptive radiation of Permian herbivores
Source: PeerJ. 2017 Apr 13;5:e3200. doi: 10.7717/peerj.3200 (PMC5392250; doi:10.7717/peerj.3200)
Supplement: Data S4 [file peerj-05-3200-s004.csv]

Skull	1	Premaxilla: ventral margin aligned anteroposteriorly in lateral view (0); anteroventrally in lateral view (1).
Skull	2	Premaxilla: alary process absent (0); alary process present on posterodorsal process (1).
Dentition	3	Premaxillary dentition: first tooth relatively small relative to maxillary caniniform (0); subequal to maxillary caniniform (1). In taxa lacking maxillary caniniforms, state 1 applies when the first premaxillary tooth is the largest marginal tooth present.
Skull	4	Maxilla: relatively straight (0); posterior end flexed laterally (1).
Dentition	5	Maxilla: posterior-most tooth positioned at level of posterior margin of orbit (0); positioned more anteriorly (1).
Dentition	6	Maxillary dentition: tooth stations number 30 teeth or more (0); 18–26 teeth (1); 14–17 teeth (2); 13 or less teeth (3). For multiple-rowed taxa, only those teeth with unobstructed profiles when viewed laterally are considered.
Dentition	7	Teeth on maxillary dental field: none (0); less than 40 (1); 40 or more (2). Definition modified from Reisz et al. (2011 Reisz, R. R., Liu, J., Li, J. and Müller, J. 2011. A new captorhinid reptile, Gansurhinus qingtoushanensis gen. et sp. nov., from the Permian of China. Naturwissenschaften, 98: 435–441. ) for clarity.
Dentition	8	Maxillary caniniform teeth: present (0); absent (1).
Dentition	9	Number of tooth rows in the upper jaw: one (0); two to four (1); five (2); six or more (3).
Dentition	10	Marginal dentition: ‘cheek’ teeth recurved (0); chisel-shaped (1); bulbous and ogival (2); bulbous at base and conical above (3).
Dentition	11	Maxilla: double row of teeth extend far anteriorly on tooth row absent (0); present (1).
Dentition	12	Dental tooth wear: absent (0); present, modest (1); present, saddle-shaped (2).
Skull	13	Lacrimal: suture with jugal small (0); well-developed (1).
Skull	14	Nasolacrimal suture: straight (0); interdigitating (1).
Skull	15	Snout: broad, equal to or greater than 35% of skull length (0); narrow, equal to or less than 25% of skull length (1).
Skull	16	Antorbital/cheek region: mainly formed by lacrimal and prefrontal (0); mostly formed by lacrimal due to a strong dorsal expansion of the bone (1).
Skull	17	Prefrontal: anterior process short and tall, approximately equal to the posterodorsal process in anteroposterior length (0); long and narrow, approximately twice the anteroposterior length of the posterodorsal process (1).
Skull	18	Frontal: anterior process short, less than 40% of the frontal sagittal length (0); long, approximately 55% of the frontal sagittal length (1).
Skull	19	Jugal: subtemporal process dorsoventrally low, equal to or less than 25% of skull height through orbital midpoint (0); dorsoventrally deep, at least 40% of skull height through orbit (1).
Skull	20	Jugal: anterior extent reaches beyond anterior orbital margin (0); not (1).
Skull	21	Jugal: postorbital extent shorter than remaining anterior extent (0); equal or longer (1).
Skull	22	Quadratojugal: anteroposteriorly elongate (0); short, not extending anteriorly beyond midpoint of postorbital margin (1).
Skull	23	Quadratojugal: acuminate anteriorly (0); square-tipped anteriorly (1).
Skull	24	Quadratojugal: posteriorly straight or decreasing in height (0); expanded dorsally (1).
Skull	25	Quadratojugal: maximum height approximately equal to one-third the height of squamosal or less (0); nearly equal to half of squamosal height (1).
Skull	26	Postorbital cheek: relatively straight (0); moderately expanded laterally (1); greatly expanded laterally (2).
Skull	27	Parietal: does not strongly project between postfrontal and postorbital (0); distinct anterolateral process present that partially separates postfrontal and postorbital (1).
Skull	28	Pineal foramen: positioned at midpoint of interparietal suture (0); anterior to midpoint of interparietal suture (1); posterior to midpoint of interparietal suture (2).
Skull	29	Sculpturing: skull surface relatively smooth, with only small honeycombing pits or grooves (0); with pits and grooves with notably larger, randomly positioned pits on posterior skull table (1).
Skull	30	Supratemporal: obliquely oriented into anteromedial direction, thereby lying within a facet of the parietal (0); positioned mediolaterally at the posterior edge of the parietal (1).
Skull	31	Supratemporal: small, slender element (0); large, contributing to skull table (1).
Skull	32	Supratemporal-postparietal contact: tenuous or absent (0); well developed (1).
Skull	33	Postparietal: contacts mate fully along height (0); dorsally only, postparietals separated slightly ventrally by supraoccipital (1).
Skull	34	Postparietal: transversely short with tabular present (0); transversely elongate with tabular absent (1).
Skull	35	Postparietal: contribution to skull table absent or forms only narrow edge (0); contribution large, forming sculptured posterior portion of skull table (1).
Skull	36	Skull table occipital margin: embayed bilaterally (0); straight (1); with single median embayment (2).
Dentition	37	Vomer: denticulate (0); edentulous (1).
Palate	38	Vomer-pterygoid contact: extensive, at least 50% median border of vomer (0); short, no more than 33% median border of vomer (1).
Dentition	39	Palatine: denticulate (0); edentulous (1).
Palate	40	Jugal/ectopterygoid: ectopterygoid present and alary process absent (0); ectopterygoid absent and alary process present, but no higher than the midpoint of the suborbital process of the jugal and distinct from the orbital margin (1); ectopterygoid absent and alary process present and positioned dorsally on the medial surface of the jugal, flush with orbital margin (2).
Dentition	41	Dentition on palatal ramus of pterygoid: present (0); greatly reduced or absent (1).
Dentition	42	Pterygoid: transverse flange dentition consists of shagreen of denticles (0); at least one row of functional teeth (1); absent (2).
Palate	43	Pterygoid: transverse flange broad-based and distinctly angular in ventral view (0); narrow and tongue-like in ventral view (1).
Palate	44	Suborbital foramen: absent (0); present (1); anteroposteriorly elongate (2).
Palate	45	Parasphenoid: cultriform process extends anteriorly (0); extends slightly dorsally at roughly 15° to the basal plane (1); extends anterodorsally at more than 45° to the basal plane (2).
Dentition	46	Parasphenoid: denticulate (0); edentulous (1).
Palate	47	Parasphenoid: deep ventral groove absent (0); present (1) between cristae ventrolateralis.
Palate	48	Parasphenoid: posterolateral wing narrow, meets narrow head of stapes (0); wing broad, meets large head of stapes, in an elongate, nearly parasagittal suture (1).
Skull	49	Opisthotic: paroccipital process long, extending near to medial edge of squamosal (0); process short, extending only slightly beyond body of opisthotic (1).
Skull	50	Paroccipital process: broad (0); narrow (1).
Skull	51	Stapes: distal process short (0); elongate (1).
Skull	52	Supraoccipital: slopes anterodorsally (0); aligned vertically or slopes posterodorsally (1).
Skull	53	Supraoccipital: lateral ascending processes account for half or less height of bone (0); lateral ascending processes account two-thirds or more height of the bone (1).
Skull	54	Occipital condyle: at level of quadrate condyles (0); immediately anterior to condyles (1).
Skull	55	Exoccipital: lateral process on dorsal ramus absent (0); present (1).
Dentition	56	Dentary: teeth isodont (0), caniniform region present anteriorly (1); caniniform tooth present anteriorly with caniniform region absent (2).
Dentition	57	Dentary: first tooth oriented mainly vertically (0); leans strongly anteriorly (1).
Mandible	58	Mandibular ramus: relatively straight in ventral view (0); sigmoidal in ventral view (1).
Mandible	59	Mandibular ramus: narrow, 8% or less of total jaw length (0); broad, no less than 14% of total jaw length (1).
Mandible	60	Mandibular ramus: posterior end rectilinear in lateral view (0); acuminate in lateral view (1).
Mandible	61	Mandibular ramus: lateral shelf absent (0); lateral shelf present below coronoid process (1).
Mandible	62	Coronoid: anterior process short (0); elongate (1).
Mandible	63	Meckelian foramen: small, anteroposterior length roughly 9% or less of total jaw length (0); large, anteroposterior length greater than or equal to 14% of total jaw length (1).
Mandible	64	Coronoid: posterodorsal process slender, forms dorsal-most quarter of lateral wall of adductor fossa (0); posterodorsal process deep, forms dorsal-most third of lateral wall of adductor fossa (1).
Mandible	65	Retroarticular process: absent (0); present and broader transversely than long (1); present and longer anteroposteriorly than broad (2).
Postcranium	66	Dorsal neural arches: narrow (0); lateral expansion present (1); exaggerated lateral expansion with swelling present (2). Modified slightly from Reisz et al. (2011 Reisz, R. R., Liu, J., Li, J. and Müller, J. 2011. A new captorhinid reptile, Gansurhinus qingtoushanensis gen. et sp. nov., from the Permian of China. Naturwissenschaften, 98: 435–441. ).
Postcranium	67	Neural spines of dorsal vertebrae: height or shape alternation present (0); absent (1).
Postcranium	68	Anterior dorsal centra: not strongly ventrolaterally constricted (0); strongly ventrolaterally constricted (1).
Postcranium	69	Sacral ribs: first sacral rib larger than second rib (0); both ribs of roughly equal size (1).
Postcranium	70	Ilium: iliac blade expanded dorsally (0); narrow dorsally (1).
Postcranium	71	Stylo- and zeugopodium: shaft massive and with proximal and distal heads significantly expanded, resulting in an overall stout impression (0); shaft slender and heads only moderately expanded (1).
Postcranium	72	Humerus: supinator process not parallel to shaft (0); parallel (1); supinator process absent (2).
Postcranium	73	Manus and pes: elements short and broad (0); long and slender (1).
Postcranium	74	Fourth metatarsal: less than half the length of tibia (0); more than half the length of tibia (1).
Postcranium	75	First metacarpal: more than half the length of fourth metacarpal (0); less than half the length of fourth metacarpal (1).
